# Supplementary material for: Molecular Mechanisms of Persistence of Mutualistic Bacteria Photorhabdus in the Entomopathogenic Nematode Host
Source: PubMed Central journal article supplement (PMC2950140; doi:10.1371/journal.pone.0013154), 2010-10-05
Supplement: pone.0013154.s004.pdf [file pone.0013154.s004.pdf]

**Table S1.** Differentially expressed *Photorhabdus temperata* genes in *Heterorhabditis bacteriophora* infective juveniles

| Class                                                                                                          | Gene -Possible function                                                                                                            | Id/Sim%                                                                    | Span   | E-value |
|----------------------------------------------------------------------------------------------------------------|------------------------------------------------------------------------------------------------------------------------------------|----------------------------------------------------------------------------|--------|---------|
| <b>Cell surface</b>                                                                                            | <b><u>ompH</u></b> (+) -Outer membrane protein skp precursor ( <i>Photorhabdus luminescens</i> , plu0681)                          | 91/98                                                                      | 165    | 1e-11   |
|                                                                                                                | <b><u>motA</u></b> (-) -Chemotaxis protein ( <i>Photorhabdus luminescens</i> , plu1849)                                            | 91/94                                                                      | 165    | 1e-27   |
|                                                                                                                | <b><u>pilN</u></b> (-) -Probable outer membrane lipoprotein ( <i>P. luminescens</i> , plu1051)                                     | 100/100                                                                    | 182    | 2e-31   |
|                                                                                                                | <b><u>ycfM</u></b> (-) -Putative outer membrane lipoprotein ( <i>P. luminescens</i> , plu2824)                                     | 93/100                                                                     | 139    | 7e-20   |
| <b>Regulation</b>                                                                                              | <b><u>fliA</u></b> (+) -Flagella biosynthesis RNA polymerase sigma factor ( <i>P. luminescens</i> , plu1955)                       | 98/100                                                                     | 150    | 8e-20   |
|                                                                                                                | <b><u>infC</u></b> (+) -Translation initiation factor IF-3 ( <i>Erwinia carotovora</i> , ECA2421; <i>P. luminescens</i> , plu2668) | 92/97                                                                      | 219    | 8e-31   |
|                                                                                                                | <b><u>padR</u></b> (+) -Transcriptional regulator PadR-like family ( <i>Xanthobacter autotrophicus</i> , Xaut_3967)                | 71/85                                                                      | 174    | 5e-18   |
|                                                                                                                | <b><u>rpoD</u></b> (+) -RNA polymerase sigma factor ( <i>P. luminescens</i> , plu3979)                                             | 87/98                                                                      | 135    | 5e-15   |
|                                                                                                                | <b><u>tufA</u></b> (+) -Translation elongation factor ( <i>P. luminescens</i> , plu4730)                                           | 97/100                                                                     | 137    | 1e-23   |
|                                                                                                                | <b><u>gntR</u></b> (-) -Repressor of gluconate operon ( <i>P. luminescens</i> , plu0496)                                           | 87/91                                                                      | 169    | 9e-26   |
|                                                                                                                | <b><u>malT</u></b> (-) -Positive regulator of mal operon ( <i>P. luminescens</i> , plu0471)                                        | 93/100                                                                     | 129    | 5e-14   |
|                                                                                                                | <b><u>oxyR</u></b> (-) -Hydrogen peroxide-inducible genes activator ( <i>P. luminescens</i> , plu4740)                             | 82/88                                                                      | 153    | 5e-17   |
|                                                                                                                | <b><u>priA</u></b> (-) -Primosomal protein N', replication factor Y ( <i>P. luminescens</i> , plu4759)                             | 77/83                                                                      | 186    | 3e-22   |
|                                                                                                                | <b>Stress response</b>                                                                                                             | <b><u>bfr</u></b> (+) -Bacterioferritin ( <i>P. luminescens</i> , plu4728) | 98/100 | 186     |
| <b><u>gloA</u></b> (+) -Glyoxalase/Bleomycin resistance protein/dioxygenase ( <i>P. luminescens</i> , plu3746) |                                                                                                                                    | 63/80                                                                      | 177    | 7e-17   |
| <b><u>dnaK</u></b> (+) -Chaperone ( <i>P. luminescens</i> , plu0579)                                           |                                                                                                                                    | 100/100                                                                    | 141    | 5e-26   |
| <b><u>marC</u></b> (+) -Probable multiple antibiotic resistance protein ( <i>P. luminescens</i> , plu2495)     |                                                                                                                                    | 90/90                                                                      | 180    | 1e-22   |
| <b><u>surA</u></b> (+) -Peptidyl-prolyl cis-trans isomerase ( <i>P. luminescens</i> , plu0611)                 |                                                                                                                                    | 90/93                                                                      | 195    | 3e-26   |
| (+) -Probable protein involved in antibiotic biosynthesis ( <i>P.</i>                                          |                                                                                                                                    | 82/88                                                                      | 203    | 6e-30   |

|                                  |                                                                                                                                                                    |         |     |       |
|----------------------------------|--------------------------------------------------------------------------------------------------------------------------------------------------------------------|---------|-----|-------|
|                                  | <i>luminescens</i> , plu3130)                                                                                                                                      |         |     |       |
|                                  | (+) -Probable protein involved in antibiotic biosynthesis ( <i>P. luminescens</i> , plu3263)                                                                       | 100/100 | 164 | 8e-32 |
|                                  | <b>acrA</b> (-) -Acriflavin resistance protein/Multidrug efflux protein ( <i>P. luminescens</i> , plu3851)                                                         | 75/76   | 194 | 5e-26 |
|                                  | <b>imp</b> (-) -Organic solvent tolerance protein precursor ( <i>P. luminescens</i> , plu0612)                                                                     | 94/98   | 148 | 9e-29 |
|                                  | (-) -Probable peptide synthetase involved in antibiotic synthesis ( <i>P. luminescens</i> , plu3123)                                                               | 83/95   | 125 | 2e-16 |
| <b>Nucleic acid modification</b> | <b>deaD</b> (+) -Inducible ATP-independent RNA helicase ( <i>P. luminescens</i> , plu4523)                                                                         | 100/100 | 174 | 1e-16 |
|                                  | <b>orn</b> (+) -Oligoribonuclease ( <i>P. luminescens</i> , plu4595)                                                                                               | 98/98   | 174 | 1e-24 |
|                                  | <b>rep</b> (+) -ABC-type DNA helicase ( <i>P. luminescens</i> , plu4667)                                                                                           | 100/100 | 171 | 5e-25 |
|                                  | <b>ydaB</b> (+) -Tail fibre protein ( <i>P. luminescens</i> , plu1464)                                                                                             | 73/79   | 168 | 4e-17 |
|                                  | (+) - <b>ISSod6 transposase</b> ( <i>Alteromonas macleodii</i> , MADE_01489)                                                                                       | 74/84   | 171 | 6e-16 |
|                                  | (+) - <b>IS630-family transposase</b> ( <i>P. luminescens</i> , plu4076)                                                                                           | 92/94   | 133 | 1e-16 |
|                                  | <b>tnpA</b> (-) -Putative ATP-binding IS21-family transposase ( <i>Escherichia coli</i> , ECS88_4898)                                                              | 78/90   | 144 | 2e-22 |
|                                  | <b>uvrD</b> (-) -UvrD-family helicase ( <i>Escherichia coli</i> , EcE24377A_3362)                                                                                  | 65/84   | 176 | 3e-17 |
|                                  | (-) -IS982-family transposase ( <i>P. luminescens</i> , plu3299)                                                                                                   | 54/73   | 193 | 5e-19 |
|                                  | (-) -IS630-family transposase ( <i>P. luminescens</i> , plu0310)                                                                                                   | 68/78   | 197 | 3e-14 |
|                                  | (-) -IS4-family transposase ( <i>Shewanella</i> sp, Sputw3181_2039)                                                                                                | 68/76   | 127 | 2e-15 |
| <b>Transport</b>                 | <b>atpA</b> (+) -ATP synthase alpha chain ( <i>P. luminescens</i> , plu0042)                                                                                       | 94/98   | 142 | 4e-26 |
|                                  | <b>atpG</b> (+) -ATP synthase subunit C ( <i>P. luminescens</i> , plu0041)                                                                                         | 100/100 | 183 | 2e-27 |
|                                  | <b>atpI</b> (+) -ATP synthase subunit I ( <i>P. luminescens</i> , plu0047)                                                                                         | 88/93   | 177 | 2e-11 |
|                                  | <b>corC</b> (+) -Mg <sup>2+</sup> /Co <sup>2+</sup> efflux protein ( <i>P. luminescens</i> , plu1309)                                                              | 98/98   | 132 | 3e-16 |
|                                  | <b>nhaB</b> (+) -Na <sup>+</sup> /H <sup>+</sup> antiporter ( <i>P. luminescens</i> , plu2563)                                                                     | 91/96   | 243 | 3e-26 |
|                                  | <b>traM</b> (+) -Tram protein ( <i>Serratia entomophila</i> , AF135182)                                                                                            | 76/88   | 126 | 5e-12 |
|                                  | <b>yiua</b> (+) -Periplasmic siderophore binding protein of ABC transporter ( <i>P. luminescens</i> , plu2853)                                                     | 68/83   | 207 | 1e-20 |
|                                  | (+) -Probable type IV secretion protein ( <i>P. luminescens</i> , plu0371)                                                                                         | 98/98   | 150 | 2e-21 |
|                                  | <b>dctQ</b> (-) -Tripartite ATP-independent periplasmic (TRAP) C4-dicarboxylate transporter ( <i>Vibrio vulnificus</i> , VPA1703; <i>P. luminescens</i> , plu0174) | 50/67   | 138 | 2e-13 |

|                   |                                                                                                                                               |         |     |       |
|-------------------|-----------------------------------------------------------------------------------------------------------------------------------------------|---------|-----|-------|
|                   | <b><u>nuoN</u></b> (-) -NADH dehydrogenase subunit N ( <i>P. luminescens</i> , plu3077)                                                       | 82/94   | 297 | 8e-39 |
|                   | <b><u>phoU</u></b> (-) -Phosphate transporter ( <i>P. luminescens</i> , plu0218)                                                              | 100/100 | 129 | 3e-19 |
|                   | <b><u>secD</u></b> (-) -Protein-export protein ( <i>P. luminescens</i> , plu3902)                                                             | 95/97   | 154 | 6e-21 |
|                   | <b><u>tctC</u></b> (-) -Tricarboxylic transporter ( <i>P. luminescens</i> , plu3181)                                                          | 100/100 | 105 | 1e-12 |
|                   | <b><u>treB</u></b> (-) -PTS system, trehalose-permease IIBC component ( <i>P. luminescens</i> , plu3288)                                      | 72/80   | 186 | 3e-22 |
|                   | <b><u>trkA</u></b> (-) -K+ importer ( <i>P. luminescens</i> , plu4671)                                                                        | 77/87   | 232 | 2e-32 |
|                   | <b><u>ybhS</u></b> (-) -ABC-type sodium efflux transporter permease protein ( <i>P. luminescens</i> , plu1507)                                | 94/97   | 102 | 2e-5  |
| <b>Metabolism</b> | <b><u>argG</u></b> (+) -Argininosuccinate synthase ( <i>P. luminescens</i> , plu4742)                                                         | 87/94   | 141 | 3e-16 |
|                   | <b><u>fabA</u></b> (+) -Beta-ketoacyl synthase ( <i>Saccharopolyspora erythraea</i> , SACE_0023)                                              | 44/63   | 237 | 8e-15 |
|                   | <b><u>gntY</u></b> (+) -Probable gluconate metabolism protein involved in iron-sulfur cluster biosynthesis ( <i>P. luminescens</i> , plu0198) | 94/100  | 159 | 5e-24 |
|                   | <b><u>ileS</u></b> (+) -Isoleucyl-tRNA synthetase ( <i>P. luminescens</i> , plu0591)                                                          | 87/100  | 159 | 6e-21 |
|                   | <b><u>metL</u></b> (+) -Aspartate kinase II/Homoserine dehydrogenase II ( <i>P. luminescens</i> , plu4755)                                    | 100/100 | 156 | 1e-21 |
|                   | <b><u>pdxY</u></b> (+) -Pyridoxine kinase ( <i>P. luminescens</i> , plu2595)                                                                  | 94/95   | 234 | 3e-37 |
|                   | <b><u>proA</u></b> (+) - $\gamma$ -glutamyl phosphate reductase ( <i>P. luminescens</i> , plu1244)                                            | 91/95   | 240 | 5e-35 |
|                   | <b><u>ptsO</u></b> (+) -Phosphocarrier protein ( <i>P. luminescens</i> , plu4045)                                                             | 93/98   | 168 | 6e-21 |
|                   | <b><u>purL</u></b> (+) -Phosphoribosylformylglycinamide synthase ( <i>P. luminescens</i> , plu3317)                                           | 98/100  | 186 | 2e-27 |
|                   | <b><u>rpe</u></b> (+) -Ribulose-5-Phosphate 3-epimerase ( <i>P. luminescens</i> , plu0086)                                                    | 98/98   | 186 | 2e-28 |
|                   | <b><u>sixA</u></b> (+) -Phosphohistidine phosphatase ( <i>P. luminescens</i> , plu3199)                                                       | 88/95   | 177 | 7e-22 |
|                   | <b><u>tktA</u></b> (+) -Transketolase ( <i>P. luminescens</i> , plu0946)                                                                      | 100/100 | 213 | 3e-34 |
|                   | <b><u>xpsD</u></b> (+) -Peptide synthetase ( <i>Xenorhabdus bovienii</i> , AF455810)                                                          | 53/73   | 203 | 4e-18 |
|                   | <b><u>yncA</u></b> (+) -Probable GCN5-related N-acetyltransferase ( <i>P. luminescens</i> , plu4503)                                          | 76/84   | 147 | 1e-13 |
|                   | <b><u>yncB</u></b> (+) -Probable Zn-dependent oxidoreductase ( <i>Escherichia coli</i> , EFER_3231; <i>P. luminescens</i> , plu4072)          | 77/91   | 159 | 8e-18 |
|                   | <b><u>aroG</u></b> (-) -3-deoxy-D-arabino-heptulosonate 7-phosphate synthetase ( <i>P. luminescens</i> , plu1470)                             | 86/90   | 150 | 3e-16 |
|                   | <b><u>carB</u></b> (-) -Carbamoylphosphate synthetase ( <i>P. luminescens</i> , plu0604)                                                      | 96/98   | 194 | 5e-34 |

|                |                                                                                                                                                      |         |     |       |
|----------------|------------------------------------------------------------------------------------------------------------------------------------------------------|---------|-----|-------|
|                | <b><i>cbiA</i></b> (-) -Cobyrinic acid a,c-diamide synthase ( <i>P. luminescens</i> , plu2999)                                                       | 98/100  | 177 | 5e-28 |
|                | <b><i>cbiH</i></b> (-) -Precorrin-3 methyltransferase ( <i>P. luminescens</i> ; plu2991)                                                             | 90/93   | 233 | 5e-32 |
|                | <b><i>cdd</i></b> (-) -Cytidine deaminase ( <i>Lysinibacillus sphaericus</i> , Bsph_0353)                                                            | 64/73   | 130 | 5e-09 |
|                | <b><i>clpA</i></b> (-) -ATP-dependent Clp protease ( <i>P. luminescens</i> , plu1594)                                                                | 85/94   | 161 | 2e-22 |
|                | <b><i>cpdB</i></b> -2',3'-cyclic-nucleotide 2'-phosphodiesterase precursor ( <i>P. luminescens</i> , plu3927)                                        | 87/91   | 146 | 2e-19 |
|                | <b><i>elbB</i></b> (-) -Enhancing lycopene biosynthesis protein 2 (SCRP-27A) ( <i>P. luminescens</i> , plu4007)                                      | 96/98   | 162 | 7e-30 |
|                | <b><i>galE</i></b> (-) -UDP-glucose 4-epimerase ( <i>P. luminescens</i> , plu4831)                                                                   | 85/91   | 151 | 5e-27 |
|                | <b><i>glpD</i></b> (-) -Aerobic glycerol-3-phosphate dehydrogenase ( <i>P. luminescens</i> , plu0194)                                                | 64/75   | 156 | 1e-10 |
|                | <b><i>gltA</i></b> (-) -Citrate synthase ( <i>Photorhabdus asymbiotica</i> , FM211057; <i>P. luminescens</i> , plu1425)                              | 92/94   | 116 | 9e-18 |
|                | <b><i>hslIV</i></b> (-) -ABC type protease ( <i>P. luminescens</i> , plu4762)                                                                        | 95/95   | 144 | 1e-26 |
|                | <b><i>iolC</i></b> (-) -Putative myo-inositol carbohydrate kinase ( <i>P. luminescens</i> , plu1801)                                                 | 88/94   | 229 | 2e-37 |
|                | <b><i>iolD</i></b> (-) -Putative thiamine pyrophosphate-dependent myo-inositol carbohydrate kinase ( <i>P. luminescens</i> , plu1805)                | 90/90   | 146 | 1e-26 |
|                | <b><i>menD</i></b> (-) -Menaquinone biosynthesis protein ( <i>P. luminescens</i> , plu3073)                                                          | 70/87   | 222 | 1e-24 |
|                | <b><i>mrsA</i></b> (-) -Phosphoglucomutase protein ( <i>P. luminescens</i> , plu4533)                                                                | 96/100  | 173 | 5e-30 |
|                | <b><i>phbC</i></b> (-) -Isochorismate synthase PhbC ( <i>P. luminescens</i> , AY042783)                                                              | 85/92   | 161 | 2e-24 |
|                | <b><i>phbF</i></b> (-) -Photobactin synthetase ( <i>P. luminescens</i> , AY042783)                                                                   | 100/100 | 159 | 2e-24 |
|                | <b><i>phbH</i></b> (-) -Photobactin synthetase PhbH ( <i>P. luminescens</i> , AY042783)                                                              | 88/91   | 203 | 3e-35 |
|                | <b><i>queF</i></b> (-) -NADPH-dependent 7-cyano-7-deazaguanine reductase ( <i>Erwinia tasmaniensis</i> , ETA_27310; <i>P. luminescens</i> , plu0662) | 68/73   | 136 | 1e-09 |
| <b>Unknown</b> | (+) - <b><u>Hypothetical protein</u></b> ( <i>P. luminescens</i> , plu0801)                                                                          | 87/90   | 93  | 1e-6  |
|                | (+) -Hypothetical protein ( <i>P. luminescens</i> , plu0830)                                                                                         | 95/97   | 180 | 9e-25 |
|                | (+) -Hypothetical protein ( <i>P. luminescens</i> , plu1160)                                                                                         | 97/100  | 90  | 3e-8  |
|                | (+) - <b><u>Hypothetical protein</u></b> ( <i>P. luminescens</i> , plu1774)                                                                          | 95/95   | 114 | 2e-11 |
|                | (+) - <b><u>Hypothetical protein</u></b> ( <i>P. luminescens</i> , plu2035)                                                                          | 81/98   | 129 | 1e-13 |

---

|                                                                                        |       |     |       |
|----------------------------------------------------------------------------------------|-------|-----|-------|
| (+) - <u>Unknown sequence flanked by plu3378 and plu3379</u> ( <i>P. luminescens</i> ) | 96/96 | 159 | 1e-26 |
| (+) -Hypothetical protein ( <i>P. luminescens</i> , plu3387)                           | 93/97 | 174 | 2e-25 |
| (+) -No similarity to known genes                                                      |       |     |       |
| (-) - <u>Hypothetical protein</u> ( <i>P. luminescens</i> , plu0428)                   | 77/87 | 177 | 2e-26 |
| (-) -Hypothetical protein ( <i>P. luminescens</i> , plu1582)                           | 75/78 | 227 | 1e-22 |
| (-) -Hypothetical protein ( <i>P. luminescens</i> , plu1927)                           | 76/86 | 139 | 1e-18 |
| (-) - <u>Hypothetical protein</u> ( <i>P. luminescens</i> , plu2339)                   | 84/89 | 129 | 6e-14 |
| (-) -Hypothetical protein ( <i>P. luminescens</i> , plu3186)                           | 86/93 | 224 | 1e-07 |
| (-) -Hypothetical protein ( <i>P. luminescens</i> , plu4553)                           | 87/94 | 174 | 1e-23 |
| (-) -No similarity to known genes (3+4)                                                |       |     |       |

---

Note: Up-regulation and down-regulation of genes are indicated by (+) and (-), respectively. Genes underlined were also differentially regulated in response to *in vitro* stationary-phase starvation conditions.
